# Supplementary material
Source: MDPI journal article supplement (https://www.mdpi.com/2297-8739/8/12/230)
Supplement: s1 [file s1]

| Statistical approach | Statistical method                      | Short Description                                                                                                           | Product            | Ref.                                                |
|----------------------|-----------------------------------------|-----------------------------------------------------------------------------------------------------------------------------|--------------------|-----------------------------------------------------|
| Unsupervised         | PCA (Principal Component Analysis)      | Method for reducing the dimensionality of datasets minimizing information loss.                                             | Apple              | [60]                                                |
|                      |                                         |                                                                                                                             | Cherry             | [32]                                                |
|                      |                                         |                                                                                                                             | Cabbage            | [34]                                                |
|                      |                                         |                                                                                                                             | Coffee             | [53]                                                |
|                      |                                         |                                                                                                                             | Hazelnut           | [7, 24]                                             |
|                      |                                         |                                                                                                                             | Lentil             | [57]                                                |
|                      |                                         |                                                                                                                             | Melons             | [28]                                                |
|                      |                                         |                                                                                                                             | Milk               | [69]                                                |
|                      |                                         |                                                                                                                             | Pistachios         | [59]                                                |
|                      |                                         |                                                                                                                             | Salvia             | [26]                                                |
|                      |                                         |                                                                                                                             | Tea                | [50, 81]                                            |
|                      |                                         |                                                                                                                             | Honey              | [12, 54, 58, 66]                                    |
|                      |                                         |                                                                                                                             | Oil                | [2, 27, 29, 30, 31, 36, 38, 44, 46, 63, 65, 77, 80] |
|                      |                                         |                                                                                                                             | Rice               | [3, 82]                                             |
|                      |                                         |                                                                                                                             | Sweet Cherry       | [5, 29]                                             |
|                      |                                         |                                                                                                                             | Tomato             | [13, 40, 62, 88]                                    |
|                      |                                         |                                                                                                                             | Wine               | [33, 35, 37, 42, 48, 55, 72, 73, 85]                |
|                      |                                         |                                                                                                                             | Whiskey            | [64]                                                |
|                      | CA (Cluster Analysis)                   | Statistical method to organize items into groups (cluster), providing information on associations and patterns on the data. | Alcoholic beverage | [47]                                                |
|                      |                                         |                                                                                                                             | Oil                | [77]                                                |
|                      |                                         |                                                                                                                             | Tea                | [81]                                                |
|                      | HCA ( Hierarchical Clustering Analysis) | The method create clusters that have a predetermined ordering from top to bottom It could be Agglomerative or Divisive.     | Cabbage            | [34]                                                |
|                      |                                         |                                                                                                                             | Honey              | [54]                                                |
|                      |                                         |                                                                                                                             | Oils               | [38]                                                |
|                      |                                         |                                                                                                                             | Tomato             | [88]                                                |
|                      | CCA ( Canonical Analysis)               | Multivariate statistical technique to determining of relationship among variables in a data set.                            | Wine               | [37]                                                |
|                      |                                         |                                                                                                                             | Milk               | [69]                                                |
|                      | kMC ( k-Means Clustering)               | The algorithm try to split a data set into a defined (k) number of clusters                                                 | Oils               | [43]                                                |
|                      | MDS ( Multidimensional Scaling)         | The aim of the algorithm is visualize the level of similarity                                                               | Oils               | [36]                                                |

|            |                                                            |                                                                                                                                                |                    |                          |
|------------|------------------------------------------------------------|------------------------------------------------------------------------------------------------------------------------------------------------|--------------------|--------------------------|
|            |                                                            | on the items of a data set.                                                                                                                    |                    |                          |
|            | LSD ( Least Significant Difference)                        | It is a value associated to a particular level of statistical probability which provides information on the possible difference between groups | Wine               | [42]                     |
|            | UPGMA ( Unweighted Pair Group Method with Arithmetic mean) | Simple clustering method with the contribution of all distances among the point are the same.                                                  | Oils               | [38]                     |
| Supervised | RDA (Regularized Discriminant Analysis)                    | Generalization of LDA; it is used to highlight the variables discriminate between two or more groups.                                          | Alcoholic beverage | [47]                     |
|            | LDA (Linear Discriminant Analysis)                         | It is a very common classification method based on a linear combination of the original variables.                                             | Rice               | [3]                      |
|            |                                                            |                                                                                                                                                | Oils               | [2, 36,, 38, 41, 43, 44] |
|            |                                                            |                                                                                                                                                | Cherries           | [5]                      |
|            |                                                            |                                                                                                                                                | Honey              | [12]                     |
|            |                                                            |                                                                                                                                                | Lentils            | [57]                     |
|            |                                                            |                                                                                                                                                | Wine               | [33, 35]                 |
|            |                                                            |                                                                                                                                                | Wheat              | [67]                     |
|            | CART ( Classification and Regression Tree)                 | Predictive algorithm where a target variable's values can be predicted based on other values                                                   | Alcoholic beverage | [ 47]                    |
|            |                                                            |                                                                                                                                                |                    |                          |
|            | PLS ( Partial Least Square)                                | Statistical method for classification particularly used if the number of variables is larger than the number of observations.                  | Tomato             | [88]                     |
|            |                                                            |                                                                                                                                                | Oils               | [80]                     |
|            |                                                            |                                                                                                                                                | Milk               | [69]                     |
|            | PLSR ( Partial Least Square Regression)                    | Classification method based on the linear regression model.                                                                                    | Oils               | [30]                     |
|            | PLS-DA( Partial Least Square – Discriminant Analysis)      | It is an algorithm used for predictive and descriptive modelling, and for the selection of discriminative variable.                            | Apples             | [60]                     |
|            |                                                            |                                                                                                                                                | Beer               | [12]                     |
|            |                                                            |                                                                                                                                                | Chicory            | [49]                     |

|  |                                                                              |                                                                                                                        |           |                          |
|--|------------------------------------------------------------------------------|------------------------------------------------------------------------------------------------------------------------|-----------|--------------------------|
|  |                                                                              |                                                                                                                        | Coffee    | [53]                     |
|  |                                                                              |                                                                                                                        | Cherry    | [5, 29]                  |
|  |                                                                              |                                                                                                                        | Honey     | [54; 58]                 |
|  |                                                                              |                                                                                                                        | Melons    | [28]                     |
|  |                                                                              |                                                                                                                        | Oils      | [27, 29, 30, 31]         |
|  |                                                                              |                                                                                                                        | Pistachio | [59]                     |
|  |                                                                              |                                                                                                                        | Spices    | [12]                     |
|  |                                                                              |                                                                                                                        | Wine      | [24, 37, 42, 48, 55]     |
|  |                                                                              |                                                                                                                        | Lentils   | [57]                     |
|  | SIMCA ( Soft Independent Modelling of Class Analogy)                         | It is an efficient statistical method for one-class classification mainly based on PCA>                                | Beer      | [12]                     |
|  |                                                                              |                                                                                                                        | Cherry    | [5]                      |
|  |                                                                              |                                                                                                                        | Lentils   | [57]]                    |
|  |                                                                              |                                                                                                                        | Wine      | [33]                     |
|  |                                                                              |                                                                                                                        | Honey     | [54]                     |
|  |                                                                              |                                                                                                                        | Pistachio | [59]                     |
|  | OPLS-DA ( Orthogonal Projections to Latent Structures Discriminant Analysis) | It is a preprocessing method for multivariate statistics that analyze the variance explained in each of component PLS. | Cherry    | [29]                     |
|  |                                                                              |                                                                                                                        | Coffee    | [39]                     |
|  |                                                                              |                                                                                                                        | Honey     | [66]                     |
|  |                                                                              |                                                                                                                        | Oils      | [27, 29, 30, 31, 63, 65] |
|  |                                                                              |                                                                                                                        | Salvia    | [26]                     |
|  |                                                                              |                                                                                                                        | Tea       | [50]                     |
|  |                                                                              |                                                                                                                        | Whiskey   | [64]                     |
|  | CL ( Classification Learner)                                                 | Classification method of objects using various classifiers (decision trees, support vector machine, etc.)              | Hazelnut  | [7]                      |
|  | DT ( Decision Trees)                                                         | The decision tree allows building classifications in the form of tree structure.                                       | Hazelnut  | [7]                      |
|  | SVM ( Support Vector Machines)                                               | It is a machine learning model that uses algorithms based on kernel trick function for group classification problems.  | Hazelnut  | [7]                      |
|  | k-NN ( Nearest Neighbor Classification)                                      | The method uses classifiers to find patterns available on a training set to classify a test pattern.                   | Lentils   | [57]]                    |
|  |                                                                              |                                                                                                                        | Milk      | [69]                     |
|  |                                                                              |                                                                                                                        | Hazelnut  | [7]                      |
|  |                                                                              |                                                                                                                        | Honey     | [54]                     |
|  | CT ( Classification trees)                                                   | The method assigns objects to classes, and provide a measure of confidence related to                                  | Hazelnut  | [24]                     |

|  |                                                          |                                                                                                                                                                            |      |      |
|--|----------------------------------------------------------|----------------------------------------------------------------------------------------------------------------------------------------------------------------------------|------|------|
|  |                                                          | the correctness of classification.                                                                                                                                         |      |      |
|  | CDA ( Canonical Discriminant Analysis)                   | The approach find the best way to separate two or more groups of objects, based on quantitative measures of a variables set.                                               | Oils | [44] |
|  | ANN ( Artificial neural networks)                        | The ANNs are represented by a set of mathematical function that learn complex data structure with the purpose to solve data classification's problems.                     | Oils | [46] |
|  | LASSO ( Least Absolute Shrinkage and Selection Operator) | The algorithm is very useful to identify the most informative variables in the original variables set and produce a classification with lower predictive errors.           | Oils | [46] |
|  | CBT ( Classification Binary Trees)                       | The method set simple classification rules on the origin of existing samples, then apply these rules on samples with unknown origin.                                       | Oils | [23] |
|  | TCA ( Tree Clustering Analysis)                          | The purpose of the algorithm is clustering the objects into meaningful groups, without any a priori hypothesis on the data classification.                                 | Oils | [43] |
|  | RF( Random Forest)                                       | The method creates a combination of decision trees, then applying them on a training and test subset of samples. The algorithm can be trained in several sequential steps. | Wine | [37] |

*Table S1: Overview of the statistical approach used for food classification problems. In the table the statistical method applied (with a short definition), the type of food product involved and the reference papers are reported.*
